# Supplementary material for: Cancer risks with JAKi and biological disease-modifying antirheumatic drugs in patients with rheumatoid arthritis or psoriatic arthritis: a national real-world cohort study
Source: PubMed Central journal article supplement — Ann Rheum Dis. 2023 Mar 3;82(7):911–9. doi: 10.1136/ard-2022-223636 (PMC10314043; doi:10.1136/ard-2022-223636), 2023-03-03
Supplement: ard-2022-223636supp001.pdf [file ard-2022-223636supp001.pdf]

**Supplementary table S1. Data sources**

|                                                                            |                                                                                                                                                                                                                                                                                                                                                                                                                                                                                                                                                         |
|----------------------------------------------------------------------------|---------------------------------------------------------------------------------------------------------------------------------------------------------------------------------------------------------------------------------------------------------------------------------------------------------------------------------------------------------------------------------------------------------------------------------------------------------------------------------------------------------------------------------------------------------|
| <b>Swedish Rheumatology Quality Register (SRQ)</b>                         | A nationwide longitudinal clinically integrated register operated by The Swedish Society for Rheumatology, started in 1996. Patients with RA and other rheumatologic diseases are registered in the SRQ and it covers 89 000 patients. SRQ contains information about disease activity and additional information such as treatment and smoking status. SRQ covers 90% of all patients with RA treated with b/tsDMARDs in Sweden.                                                                                                                       |
| <b>Swedish Patient Register (NPR)</b>                                      | A national register maintained by The National Board of Health and Welfare. Hospital discharges from inpatient care and patients visits in non-primary outpatient care, have been registered, since 1964 and 2001 respectively. Diagnoses are coded according to the Swedish version of the International Classification of Disease (ICD).                                                                                                                                                                                                              |
| <b>Longitudinal database for insurance and labor market-studies (LISA)</b> | A national register maintained by Statistics Sweden. It contains information about sick leave, parental leave and employment status in Sweden from 1990                                                                                                                                                                                                                                                                                                                                                                                                 |
| <b>Prescribed Drug Register (PDR)</b>                                      | A national register maintained by The National Board of Health and Welfare. It contains information about all drugs dispensed on prescription in Sweden and is linked to the personal identification number since 2005.                                                                                                                                                                                                                                                                                                                                 |
| <b>Swedish population register</b>                                         | A national register maintained by Swedish Tax agency. Contains information such as home district, civil status and migration data.                                                                                                                                                                                                                                                                                                                                                                                                                      |
| <b>Cause of Death Register</b>                                             | The Cause of Death Register is a national register containing information on date and cause of death (underlying and contributory) for all deceased residents, including deaths among Swedish residents who died abroad. The register was started in 1952, and the data is considered complete since 1961. From that year and onward, cause of death is missing for less than 0.5% of deceased individuals, and in 2002, a validation study estimated that only 3.3% had any errors at the three-digit level of the ICD-coded underlying cause of death |
| <b>Cancer register</b>                                                     | A national register started in 1958. The coverage of the cancer register is estimated to more than 95%; the register contains data on date of diagnosis and type of incident cancers.                                                                                                                                                                                                                                                                                                                                                                   |

**Supplementary Table S2. Definitions of cancer outcomes**

| <b>Outcome definition</b>                                                                                                           | <b>ICD10 codes from Cancer Register and Cause of Death Register</b>                                                                                                                                                  |
|-------------------------------------------------------------------------------------------------------------------------------------|----------------------------------------------------------------------------------------------------------------------------------------------------------------------------------------------------------------------|
| Malignant melanomas                                                                                                                 | ICD10: C43                                                                                                                                                                                                           |
| Skin cancer NMSC (basal cell carcinoma and squamous cell carcinoma)                                                                 | SCC = ICD7: 191 and snomed10: 80703 (Cancer register only) and basal cell cancers identified using the basal cell cancer registry. For a history of cancer where NMSC was removed ICD7=191 was used to identify NMSC |
| Invasive prostate cancer                                                                                                            | ICD10: C61                                                                                                                                                                                                           |
| Invasive testicular cancer                                                                                                          | ICD10: C62                                                                                                                                                                                                           |
| Invasive female breast cancer                                                                                                       | ICD10: C50                                                                                                                                                                                                           |
| All invasive hematopoietic cancer (leukemias, immunoproliferative-, myeloproliferative-, lymphoproliferative disease and lymphomas) | ICD10: C81, C82, C83, C84, C85, C90, C91, C92, C93, C94, C95                                                                                                                                                         |
| Malignant lymphomas                                                                                                                 | Non-Hodgkin lymphoma: C82, C83, C84, C85, C86, C88, C914. Hodgkin lymphoma C81. Chronic lymphocytic leukemia (CLL) C911, C913, C916                                                                                  |
| Invasive renal cancer                                                                                                               | ICD10: C64                                                                                                                                                                                                           |
| Invasive lung and pleura cancer                                                                                                     | ICD10: C34, C38                                                                                                                                                                                                      |
| Invasive colorectal cancer                                                                                                          | ICD10: C18, C19, C20, C21                                                                                                                                                                                            |
| Invasive ovarian cancer                                                                                                             | ICD10: C56                                                                                                                                                                                                           |
| Invasive cervixcancer                                                                                                               | ICD10: C53                                                                                                                                                                                                           |
| Invasive urinary tract cancer                                                                                                       | ICD10: C66, C67, C68                                                                                                                                                                                                 |
| Invasive CNS cancer                                                                                                                 | ICD10: C70, C71                                                                                                                                                                                                      |
| Invasive uterine cancer                                                                                                             | ICD10: C54                                                                                                                                                                                                           |
| Invasive ear, nose and throat cancer                                                                                                | ICD10: C09, C30, C31, C32, C33                                                                                                                                                                                       |
| Invasive digestive tract cancer (esophagus, ileum, jejunum, ventricle)                                                              | ICD10: C15, C16, C17,                                                                                                                                                                                                |
| Invasive pancreas cancer                                                                                                            | ICD10: C25                                                                                                                                                                                                           |
| Invasive liver and gallbladder cancer                                                                                               | ICD10: C22, C23, C24                                                                                                                                                                                                 |

**Supplementary Table S3. Variable definitions including ATC and ICD codes used for comorbidities and drugs**

| <b>Variable</b>                    | <b>Description</b>                                                                                                                                                                                                                                                                                                                                                                                                                                                                                                                                                                                                                                                                    |
|------------------------------------|---------------------------------------------------------------------------------------------------------------------------------------------------------------------------------------------------------------------------------------------------------------------------------------------------------------------------------------------------------------------------------------------------------------------------------------------------------------------------------------------------------------------------------------------------------------------------------------------------------------------------------------------------------------------------------------|
| <b>Baseline characteristics</b>    |                                                                                                                                                                                                                                                                                                                                                                                                                                                                                                                                                                                                                                                                                       |
| Age                                | Age at cohort entry (categorized according to quartiles for analysis)                                                                                                                                                                                                                                                                                                                                                                                                                                                                                                                                                                                                                 |
| Female                             | Indicator for sex of individual                                                                                                                                                                                                                                                                                                                                                                                                                                                                                                                                                                                                                                                       |
| <b>Comorbidities</b>               |                                                                                                                                                                                                                                                                                                                                                                                                                                                                                                                                                                                                                                                                                       |
| History of cancer                  | History of cancer recorded within 5 years prior to cohort entry. Non-benign cancers excluding non-melanoma skin cancer (ICD7=191). Data retrieved from the Cancer Register. Indicator variable (Y/N).                                                                                                                                                                                                                                                                                                                                                                                                                                                                                 |
| History of diabetes                | History of diabetes recorded in the 5 years recorded prior to cohort entry. Defined as a record in the National Patient Register (inpatient and outpatient components, ICD10: E10-E14) or dispensation of treatment (ATC: A10) in the Prescribed Drug Register. Indicator variable (Y/N).                                                                                                                                                                                                                                                                                                                                                                                             |
| History of heart failure           | History of heart failure recorded in the 5 years recorded prior to cohort entry. Defined as record in National Patient Register (inpatient component, ICD10: I50). Indicator variable (Y/N).                                                                                                                                                                                                                                                                                                                                                                                                                                                                                          |
| History of ischemic heart disease  | History of ischemic heart disease recorded in the 5 years recorded prior to cohort entry. Defined as record in National Patient Register (inpatient component, ICD10: I20-I25). Indicator variable (Y/N).                                                                                                                                                                                                                                                                                                                                                                                                                                                                             |
| History of hospitalized infections | History of infections recorded in the 5 years prior to cohort entry. Defined as recorded in National Patient Register (inpatient component, ICD10: A00-B99, D73.3, E06.0, E32.1, G00-G02, G04.2, G05-G07, H00.0, H44.0, H60.0-H60.3, H66-H67, H70, I30.1, I40.0, J00-J22, J32, J34.0, J36, J38.3, J39.0-J39.1, J44.0, J85, J86, K04.4, K04.6, K04.7, K10.2, K11.3, K12.2, K14.0, K57.0, K57.2, K57.4, K57.8, K61, K63.0, K65.0, K65.1, K65.2, K65.9, L00-L08, L30.3, M00-M01, M46.2-M46.5, M60.0, M65.0, M71.0, M71.1, M72.6, M86, N10, N11, N12, N13.6, N15.1, N15.9, N30.0 N30.8, N34.0, N41.2, N43.1, N45.2, N45.3, N45.4, N48.2, N61, N70, N73, N75.1). Indicator variable (Y/N). |
| History of lung disease            | History of lung disease other than infectious pneumonia recorded in the 5 years recorded prior to cohort entry. Defined as record in National Patient Register (inpatient and outpatient components, ICD10: J40-J94). Indicator variable (Y/N).                                                                                                                                                                                                                                                                                                                                                                                                                                       |
| History of kidney failure          | History of kidney failure recorded in the 5 years recorded prior to cohort entry. Defined as record in National Patient Register (inpatient and outpatient components, ICD10:N17-N19). Indicator variable (Y/N).                                                                                                                                                                                                                                                                                                                                                                                                                                                                      |
| History of joint surgery           | History of joint surgery recorded in the 10 years prior to cohort entry. Defined as record in National Patient Register (inpatient and outpatient components, operational codes: NGB, NFB, NBB, NHB, NHC,                                                                                                                                                                                                                                                                                                                                                                                                                                                                             |

|                              |                                                                                                                                                                                                                                                                   |
|------------------------------|-------------------------------------------------------------------------------------------------------------------------------------------------------------------------------------------------------------------------------------------------------------------|
|                              | NHE, NHF, NHG, 8423, 8424, 8426, 8419, 8437, 8436, 8420, 8421, 8422, 8400-8415). Indicator variable (Y/N).                                                                                                                                                        |
| History of VTE               | I80-I82 and I26. Defined as record in National Patient Register (inpatient and outpatient components), in the 5 years prior to treatment initiation/cohort entry.                                                                                                 |
| History of Stroke            | I50-I69. Defined as record in National Patient Register (inpatient and outpatient components), in the 5 years prior to treatment initiation/cohort entry.                                                                                                         |
| History of NMSC              | ICD7 191. Defined as any previous diagnosis of NMSC in the Swedish Cancer Register (both benign and non-benign NMSC).                                                                                                                                             |
| <b>Socioeconomics</b>        |                                                                                                                                                                                                                                                                   |
| Education                    | Highest education achieved as recorded in the year prior to cohort entry. Data obtained from the Longitudinal integrated database for health insurance and labor market studies (LISA). Categorized into <12 years or ≥12 years.                                  |
| Civil status                 | Civil status recorded in the year prior to cohort entry. Categorized into married/partner, or single.                                                                                                                                                             |
| <b>Disease-related</b>       |                                                                                                                                                                                                                                                                   |
| Disease duration             | Calculated as the difference between the disease debut date and cohort entry. Categorized as <5 years and ≥5 years in statistical analyses                                                                                                                        |
| Seropositivity               | Indicator for seropositive disease (versus seronegative/unknown). Calculated using RF and ACPA values in the SRQ diagnoses.                                                                                                                                       |
| DAS28CRP                     | Taken from the visit closest to cohort entry within -60 and +15 days. Categorized into quartiles.                                                                                                                                                                 |
| Smoker                       | Taken from SRQ visit information using a window of -5 years to +30 days of cohort entry. Indicator variable: smoker or non-smoker.                                                                                                                                |
| CRP                          | Taken from the visit closest to cohort entry within -60 and +15 days. Categorized as: <5, 5-9, 10-19, ≥20.                                                                                                                                                        |
| Number of previous biologics | Calculated using all available b/tsDMARD (biological/targeted synthetic disease modifying anti rheumatic drugs) information from the SRQ, since its inception in 1999. Categorized into 0, 1-2 and ≥3 for inclusion in statistical analyses.                      |
| <b>Treatment-related</b>     |                                                                                                                                                                                                                                                                   |
| b/tsDMARDs                   | Etanercept: L04AB01, Adalimumab: L04AB04, Certolizumab pegol: L04AB05, Infliximab: L04AB02, Golimumab: L04AB06, Rituximab: L01XC02, Abatacept: L04AA24, Tocilizumab: L04AC07, Baricitinib: L04AA37, Tofacitinib: L04AA29, Upadacitinib L04AA44, Sarilumab L04AC14 |
| csDMARD                      | Sulfasalazine: A07EC01, Leflunomide: L04AA13, Cyclosporine: L04AD01, Azathioprine: L04AX01, Methotrexate: L04AX03, L01BA01, Hydroxychloroquine and Chloroquine P01BA01, P01BA02                                                                                   |

|                                                 |                                                                                                                                                                                                                                                                                            |
|-------------------------------------------------|--------------------------------------------------------------------------------------------------------------------------------------------------------------------------------------------------------------------------------------------------------------------------------------------|
| Concomitant steroid use                         | Dispensation of steroids (ATC: H02AB06) recorded in the Prescribed Drug Register in the 183 days prior to cohort entry.                                                                                                                                                                    |
| Concomitant methotrexate use                    | Concomitant methotrexate use defined as dispensation of recorded in the Prescribed Drug Register within the 183 days prior to cohort entry where the dispensation occurs after the order date of the treatment defining the exposure cohort (ATC code: L04AX03)                            |
| Concomitant csDMARD use                         | Concomitant csDMARD use defined as dispensation of csDMARD recorded in the Prescribed Drug Register within the 90 days prior to cohort entry (ATC codes: L04AX01, A07EC01, L04AD01, P01BA01, M01CB01, L04AA06, L01AA01, P01BA02, L04AA13, M01CB03) Note methotrexate is not included here. |
| Prednisolone treatment prior 1 year             | Total milligrams of prednisolone dispensed during a 1 year look back. Dispensations recorded in the prescribed drug register (ATC H02AB06)                                                                                                                                                 |
| Prednisolone treatment prior 1 year categorized | Daily prednisolone (defined as above divided by 365.25) categorized into 0, 1-5,6-10, $\geq 10$                                                                                                                                                                                            |
| Lipid lowering drug use                         | Dispensation of ATC C10A, C10B recorded in 183 days prior to cohort entry.                                                                                                                                                                                                                 |

**Supplementary table S4. Inclusion criteria for the cardiovascular risk factor enriched subset of the RA treatment cohorts**

Patients aged 50 or older at treatment initiation

At least one cardiovascular disease risk (CVD) factor:

1. Hypertension diagnosis in the past 5 years (National Patient Register)
2. Dispensation of a lipid-lowering drug in the past 183 days (Prescribed Drug Register ATC=C10A, C10B)
3. History of diabetes in the past 5 years (both National Patient Register and Prescribed Drug Register)
4. History of CVD in the past 5 years (ICD10 I20-I25)  
Family history of CVD ever. For female first-degree relatives: events that occur at age 65 or younger. For male first-degree relatives: events that occur at age 55 or younger (Total Population Register for selecting relatives, CVD from inpatient records with ICD10 I20-I25, plus main cause of death I00-I99)

No hospitalised infection recorded in the previous 6 months (inpatient component of the National Patient Register)

No previous cancer diagnosis ever (Swedish Cancer Register)

Supplementary table S5. Baseline characteristics of the study cohorts of Swedish patients with psoriatic arthritis by treatment status

|                                         | JAKis           |                 |                  |                 | Non-TNFi        | TNFi           | General population |
|-----------------------------------------|-----------------|-----------------|------------------|-----------------|-----------------|----------------|--------------------|
|                                         | Tofacitinib     | Baricitinib     | Upadacitinib     | All JAKis       |                 |                |                    |
| <b>Individuals</b>                      | 305             | 83              | 7                | 379             | 185             | 4186           | 21 285             |
| Age years, median (IQR)                 | 52 (45–61)      | 54 (47–63)      | 48 (41–54)       | 52 (45–61)      | 54 (45–62)      | 50 (41–59)     | 49 (41–59)         |
| Female, %                               | 71%             | 70%             | 71%              | 71%             | 71%             | 55%            | 54%                |
| <b>Median follow-up, years</b>          | 1.49            | 1.98            | 0.40             | 1.52            | 2.25            | 2.44           | 2.56               |
| <b>Total person time at risk, years</b> | 426             | 156             | 3                | 585             | 418             | 12623          | 54005              |
| <b>Disease-related</b>                  |                 |                 |                  |                 |                 |                |                    |
| Disease duration years, median (IQR)    | 12.2 (6.5–19.1) | 13.9 (7.8–18.4) | 16.8 (11.3–19.8) | 12.7 (6.8–19.0) | 12.4 (6.5–19.4) | 8.2 (3.6–15.5) |                    |
| Seropositivity, %                       | 0%              | 0%              | 0%               | 0%              | 0%              | 0%             |                    |
| DAS28CRP, median (IQR)                  | 4.2 (3.75–5.0)  | 4.0 (3.0–4.5)   | 4.3 (4.3–4.7)    | 4.1 (3.5–4.9)   | 4.2 (3.4–5.1)   | 3.8 (3.0–4.5)  |                    |
| DAS28CRP missing, %                     | 48%             | 52%             | 29%              | 49%             | 54%             | 51%            |                    |
| CRP <5, %                               | 50%             | 55%             | 80%              | 52%             | 47%             | 58%            |                    |
| CRP 5–9, %                              | 15%             | 14%             | 0%               | 15%             | 17%             | 18%            |                    |
| CRP 10–19, %                            | 17%             | 14%             | 0%               | 16%             | 17%             | 14%            |                    |
| CRP ≥20, %                              | 18%             | 18%             | 20%              | 18%             | 19%             | 10%            |                    |
| CRP missing, %                          | 33%             | 39%             | 29%              | 34%             | 42%             | 38%            |                    |
| Smoker, %                               | 57%             | 62%             | 80%              | 58%             | 59%             | 55%            |                    |
| Smoking missing, %                      | 14%             | 18%             | 29%              | 15%             | 20%             | 38%            |                    |
| 0 previous b/tsDMARDs                   | 7%              | 8%              | (n/a)            | 7%              | 11%             | 65%            |                    |
| 1–2 previous b/tsDMARDs                 | 41%             | 35%             | 29%              | 40%             | 41%             | 30%            |                    |
| 3+ previous b/tsDMARDs                  | 52%             | 57%             | 71%              | 53%             | 48%             | 5%             |                    |
| <b>Treatment-related</b>                |                 |                 |                  |                 |                 |                |                    |

|                                                  |               |               |               |               |               |               |               |
|--------------------------------------------------|---------------|---------------|---------------|---------------|---------------|---------------|---------------|
| Concomitant steroid use, %                       | 43%           | 49%           | 43%           | 45%           | 53%           | 34%           | 2%            |
| Concomitant methotrexate use, %                  | 36%           | 40%           | 43%           | 37%           | 39%           | 50%           | 0%            |
| Prednisolone use mg prior 1 year, %              | 2.7 (1.4–5.5) | 3.5 (1.4–5.6) | 4.2 (2.8–5.6) | 2.7 (1.4–5.5) | 4.1 (1.4–7.0) | 2.7 (1.4–4.2) | 1.4 (0.7–4.1) |
| <b>Comorbidities (previous 5 years), %</b>       |               |               |               |               |               |               |               |
| History of diabetes type 1 and 2                 | 14%           | 11%           | 0%            | 13%           | 12%           | 8%            | 6%            |
| History of ischemic heart disease                | 5%            | 4%            | 14%           | 5%            | 7%            | 2%            | 1%            |
| History of hospitalized infections               | 13%           | 15%           | 0%            | 13%           | 13%           | 6%            | 2%            |
| History of Chronic obstructive pulmonary disease | 8%            | 7%            | 0%            | 8%            | 9%            | 5%            | 2%            |
| History of kidney failure                        | 2%            | 1%            | 0%            | 2%            | 7%            | 1%            | 1%            |
| History of heart failure                         | 1%            | 4%            | 0%            | 1%            | 1%            | 1%            | 1%            |
| History of stroke                                | 4%            | 8%            | 29%           | 5%            | 4%            | 2%            | 2%            |
| History of VTE                                   | 2%            | 2%            | 0%            | 2%            | 4%            | 2%            | 1%            |
| History of joint surgery                         | 5%            | 8%            | 14%           | 6%            | 9%            | 3%            | 1%            |
| History of hypertension                          | 13%           | 7%            | 29%           | 12%           | 13%           | 7%            | 4%            |
| History of NMSC                                  | 1%            | 2.4%          | 0%            | 1.3%          | 0.5%          | 0.5%          | 0.4%          |
| <b>Drug dispensations (previous 6 months), %</b> |               |               |               |               |               |               |               |
| Lipid lowering                                   | 13%           | 12%           | 0%            | 13%           | 17%           | 11%           | 9%            |



|                                               |          |           |        |          |          |          |          |
|-----------------------------------------------|----------|-----------|--------|----------|----------|----------|----------|
| <b>Other measures of comorbidities/health</b> |          |           |        |          |          |          |          |
| Hospital days in the previous year            | 6 (4–11) | 15 (6–18) | . (-.) | 7 (4–15) | 8 (3–18) | 5 (3–11) | 4 (2–12) |
| Sick leave in the previous year, %            | 23%      | 23%       | 0%     | 23%      | 19%      | 20%      | 8%       |
| Disability pension in the previous year, %    | 2%       | 1%        | 0%     | 2%       | 0%       | 1%       | 0%       |
| <b>Socioeconomics</b>                         |          |           |        |          |          |          |          |
| Education >12 years, %                        | 35%      | 28%       | 43%    | 33%      | 33%      | 34%      | 40%      |
| Married/partner, %                            | 50%      | 55%       | 71%    | 51%      | 46%      | 49%      | 46%      |

Abbreviations: RA, rheumatoid arthritis; CRP, C-reactive protein, VTE, venous thromboembolism; NMSC, non-melanoma skin cancer; b/tsDMARD, biologic/targeted synthetic disease modifying anti-rheumatic drug; TNFi, Tumor necrosis factor inhibitor; JAKi, Janus kinase inhibitor, DAS28CRP, disease activity score 28 C-reactive protein; IQR, interquartile range (25<sup>th</sup> percentile – 75<sup>th</sup> percentile).

**Supplementary table S6. Hazard Ratios (HR1-4), events, crude and standardized incidence rates, for all cancers other than NMSC and for cancer sites where at least five incident events were observed in the JAK cohort, in Swedish patients with RA treated with JAKi, non-TNFi bDMARDs, or TNFi**

| Cohort                             | Events | Crude incidence rate | Standardized incidence rate | HR1*                | HR2*                | HR3*                | HR4*                |
|------------------------------------|--------|----------------------|-----------------------------|---------------------|---------------------|---------------------|---------------------|
| <b>All cancers other than NMSC</b> |        |                      |                             |                     |                     |                     |                     |
| JAKi                               | 38     | 9.5                  | 8.3                         | 0.93 (0.64 to 1.35) | 0.84 (0.57 to 1.25) | 0.65 (0.34 to 1.23) | 0.94 (0.65 to 1.38) |
| Tofacitinib                        | 8      | 10.1                 | 11.2                        | 1.13 (0.55 to 2.33) | 0.95 (0.44 to 2.08) | 1.04 (0.35 to 3.10) | 1.08 (0.52 to 2.24) |
| Baricitinib                        | 30     | 9.4                  | 8.0                         | 0.90 (0.60 to 1.35) | 0.82 (0.54 to 1.26) | 0.56 (0.27 to 1.16) | 0.92 (0.61 to 1.38) |
| Non-TNFi bDMARD*                   | 141    | 12.8                 | 10.5                        | 1.17 (0.93 to 1.47) | 1.09 (0.86 to 1.38) | 1.29 (0.89 to 1.85) | 1.12 (0.88 to 1.43) |
| TNFi                               | 213    | 10.1                 | 10.1                        | 1.0 (Reference)     | 1.0 (Reference)     | 1.0 (Reference)     | 1.0 (Reference)     |
| General population                 | 1245   | 9.7                  | 9.2                         | 0.86 (0.73 to 1.01) | 0.90 (0.76 to 1.07) | n/a                 | n/a                 |
| <b>NMSC</b>                        |        |                      |                             |                     |                     |                     |                     |
| All JAKi                           | 59     | 14.9                 | 12.9                        | 1.41 (1.03 to 1.92) | 1.39 (1.02 to 1.90) | 1.56 (0.96 to 2.56) | 1.39 (1.01 to 1.91) |
| - Tofacitinib                      | 11     | 14.1                 | 14.9                        | -                   | -                   | -                   | -                   |
| - Baricitinib                      | 48     | 15.2                 | 12.5                        | -                   | -                   | -                   | -                   |
| Non-TNFi bDMARD*                   | 126    | 11.4                 | 9.0                         | 1.03 (0.81 to 1.31) | 1.03 (0.81 to 1.32) | 1.22 (0.83 to 1.79) | 1.00 (0.78 to 1.28) |
| TNFi                               | 189    | 9.0                  | 9.0                         | 1.0 (Reference)     | 1.0 (Reference)     | 1.0 (Reference)     | 1.0 (Reference)     |
| General population                 | 852    | 6.6                  | 6.2                         | 0.71 (0.59 to 0.85) | 0.71 (0.59 to 0.86) | n/a                 | n/a                 |
| <b>Breast cancer</b>               |        |                      |                             |                     |                     |                     |                     |
| All JAKi                           | 7      | 1.7                  | 1.6                         | 0.68 (0.28 to 1.65) | 0.67 (0.27 to 1.66) | 0.85 (0.22 to 3.27) | 0.73 (0.29 to 1.86) |
| - Tofacitinib                      | 1      | 1.3                  | -                           | -                   | -                   | -                   | -                   |
| - Baricitinib                      | 6      | 1.9                  | 1.7                         | -                   | -                   | -                   | -                   |
| Non-TNFi bDMARD*                   | 23     | 2.1                  | 1.9                         | 0.87 (0.50 to 1.52) | 0.79 (0.44 to 1.43) | 1.09 (0.45 to 2.65) | 0.88 (0.48 to 1.61) |

|                         |     |     |     |                     |                     |                     |                     |
|-------------------------|-----|-----|-----|---------------------|---------------------|---------------------|---------------------|
| TNFi                    | 42  | 2.0 | 2.0 | 1.0 (Reference)     | 1.0 (Reference)     | 1.0 (Reference)     | 1.0 (Reference)     |
| General population      | 262 | 2.0 | 2.0 | 1.07 (0.72 to 1.59) | 1.12 (0.75 to 1.68) | n/a                 | n/a                 |
| <b>All Hematopoetic</b> |     |     |     |                     |                     |                     |                     |
| All JAKi                | 6   | 1.5 | 1.5 | 1.76 (0.67 to 4.60) | 1.74 (0.66 to 4.61) | 1.29 (0.28 to 6.04) | 1.90 (0.70 to 5.16) |
| - Tofacitinib           | 1   | 1.3 | -   | -                   | -                   | -                   | -                   |
| - Baricitinib           | 5   | 1.6 | 1.6 | -                   | -                   | -                   | -                   |
| Non-TNFi bDMARD*        | 12  | 1.1 | 0.9 | 1.03 (0.51 to 2.10) | 1.03 (0.51 to 2.08) | 1.13 (0.38 to 3.37) | 1.04 (0.48 to 2.25) |
| TNFi                    | 22  | 1.0 | 1.0 | 1.0 (Reference)     | 1.0 (Reference)     | 1.0 (Reference)     | 1.0 (Reference)     |
| General population      | 99  | 0.8 | 0.7 | 0.66 (0.39 to 1.11) | 0.69 (0.40 to 1.17) | n/a                 | n/a                 |
| <b>Lung cancer</b>      |     |     |     |                     |                     |                     |                     |
| All JAKi                | 7   | 1.7 | 1.5 | 1.58 (0.70 to 3.53) | 0.84 (0.31-2.27)    | 0.46 (0.05 to 4.36) | 1.15 (0.57 to 2.32) |
| - Tofacitinib           | 2   | 2.5 | -   | -                   | -                   | -                   | -                   |
| - Baricitinib           | 5   | 1.6 | 1.2 | -                   | -                   | -                   | -                   |
| Non-TNFi bDMARD*        | 11  | 1.0 | 0.7 | 0.68 (0.34 to 1.36) | 0.54 (0.27-1.10)    | 0.80 (0.32 to 1.97) | 0.59 (0.31 to 1.15) |
| TNFi                    | 30  | 1.4 | 1.4 | 1.0 (Reference)     | 1.0 (Reference)     | 1.0 (Reference)     | 1.0 (Reference)     |
| General population      | 111 | 0.9 | 0.8 | 0.53 (0.34 to 0.83) | 0.57 (0.35-0.93)    | n/a                 | n/a                 |

Abbreviations: TNFi; tumor necrosis factor inhibitor, JAKi; janus kinas inhibitor, \*Non-TNFI bDMARD includes rituximab, abatacept, tocilizumab.

Incidence rates presented per 1,000 person-years.

\* HR1: adjusted for age, sex, line of therapy (for these variables, there was no missingness)

\*HR2: as HR1 but adjusted for comorbidities and SES (for these variables, there was no missingness)

\*HR3: as HR2 but additionally adjusted for disease-related factors, complete case approach

\*HR4: as HR3 but with missing categories included for those variables with missing information

n/a presented where analyses not performed (due to disease-related factors not being available for the general population comparator)

**Supplementary table S7. Number of incident BCC and SCC events contributing to the NMSC outcome, by cohort**

| <b>Cohort</b>      | <b>NMSC events</b> | <b>BCC events</b> | <b>SCC events</b> |
|--------------------|--------------------|-------------------|-------------------|
| JAKi               | 59                 | 51                | 8                 |
| Tofacitinib        | 11                 | 11                | 0                 |
| Baricitinib        | 48                 | 40                | 8                 |
| Non-TNFi bDMARD*   | 126                | 108               | 19                |
| TNFi               | 189                | 158               | 31                |
| General population | 852                | 776               | 76                |

Abbreviations: NMSC; non-melanoma skin cancer, BCC; basal cell carcinoma (BCC), SCC; squamous cell carcinomas, TNFi; tumor necrosis factor inhibitor, JAKi; janus kinas inhibitor, \*Non-TNFI bDMARD includes rituximab, abatacept, tocilizumab

**Supplementary table S8. Distribution of events across cohort and history of NMSC**

| <b>Cohort</b>                      | <b>Events overall</b> | <b>Events, history of NMSC<br/>(% of overall)</b> |
|------------------------------------|-----------------------|---------------------------------------------------|
| <b>All cancers other than NMSC</b> |                       |                                                   |
| All JAKi                           | 38                    | 2 (5)                                             |
| -Tofacitnib                        | 8                     | 0 (0)                                             |
| - Baricitinib                      | 30                    | 2 (7)                                             |
| Non-TNFi bDMARD †                  | 141                   | 6 (4)                                             |
| TNFi                               | 213                   | 7 (3)                                             |
| General population                 | 1245                  | 30 (2)                                            |
| <b>NMSC</b>                        |                       |                                                   |
| All JAKi                           | 59                    | 7 (12)                                            |
| -Tofacitnib                        | 11                    | 0 (0)                                             |
| - Baricitinib                      | 48                    | 7 (15)                                            |
| Non-TNFi bDMARD †                  | 126                   | 20 (16)                                           |
| TNFi                               | 189                   | 24 (13)                                           |
| General population                 | 852                   | 74 (9)                                            |

Abbreviations: NMSC; non-melanoma skin cancer, BCC; basal cell carcinoma (BCC), SCC; squamous cell carcinomas, TNFi; tumor necrosis factor inhibitor, JAKi; janus kinas inhibitor, \*Non-TNFI bDMARD includes rituximab, abatacept, tocilizumab

**Supplementary table S9. Hazard Ratios (HR1-4) for all cancers other than NMSC, and NMSC, in patients with RA treated with; JAKis, non-TNFis and TNFis by time since treatment initiation**

|                                    | HR1*                | HR2*                | HR3*                | HR4*                |
|------------------------------------|---------------------|---------------------|---------------------|---------------------|
| <b>All cancers other than NMSC</b> |                     |                     |                     |                     |
| <b>0-1 year</b>                    |                     |                     |                     |                     |
| JAKi                               | 1.01 (0.60 to 1.67) | 0.85 (0.48 to 1.48) | 0.62 (0.26 to 1.50) | 0.96 (0.58 to 1.59) |
| Non-TNFi                           | 1.19 (0.83 to 1.72) | 1.09 (0.74 to 1.59) | 1.34 (0.78 to 2.30) | 1.11 (0.77 to 1.61) |
| TNFi                               | 1.0 (Reference)     | 1.0 (Reference)     | 1.0 (Reference)     | 1.0 (Reference)     |
| <b>1-2 years</b>                   |                     |                     |                     |                     |
| JAKi                               | 0.67 (0.32 to 1.42) | 0.66 (0.31 to 1.40) | 0.32 (0.07 to 1.40) | 0.67 (0.32 to 1.43) |
| Non-TNFi                           | 1.26 (0.82 to 1.95) | 1.16 (0.74 to 1.81) | 1.21 (0.62 to 2.38) | 1.25 (0.80 to 1.96) |
| TNFi                               | 1.0 (Reference)     | 1.0 (Reference)     | 1.0 (Reference)     | 1.0 (Reference)     |
| <b>2 or more years</b>             |                     |                     |                     |                     |
| JAKi                               | 1.35 (0.67 to 2.71) | 1.30 (0.64 to 2.62) | 1.20 (0.44 to 3.30) | 1.36 (0.67 to 2.75) |
| Non-TNFi                           | 1.05 (0.73 to 1.50) | 1.00 (0.70 to 1.43) | 1.30 (0.78 to 2.15) | 1.06 (0.74 to 1.53) |
| TNFi                               | 1.0 (Reference)     | 1.0 (Reference)     | 1.0 (Reference)     | 1.0 (Reference)     |
| <b>NMSC</b>                        |                     |                     |                     |                     |
| <b>0-1 year</b>                    |                     |                     |                     |                     |
| JAKi                               | 1.09 (0.69 to 1.73) | 1.11 (0.70 to 1.77) | 1.24 (0.64 to 2.41) | 1.12 (0.70 to 1.78) |
| Non-TNFi                           | 0.85 (0.57 to 1.25) | 0.85 (0.57 to 1.27) | 1.06 (0.60 to 1.86) | 0.85 (0.57 to 1.26) |
| TNFi                               | 1.0 (Reference)     | 1.0 (Reference)     | 1.0 (Reference)     | 1.0 (Reference)     |
| <b>1-2 years</b>                   |                     |                     |                     |                     |
| JAKi                               | 1.44 (0.84 to 2.45) | 1.39 (0.81 to 2.39) | 2.55 (1.13 to 5.78) | 1.48 (0.87 to 2.51) |
| Non-TNFi                           | 1.42 (0.95 to 2.14) | 1.47 (0.98 to 2.22) | 1.89 (0.95 to 3.75) | 1.43 (0.95 to 2.15) |
| TNFi                               | 1.0 (Reference)     | 1.0 (Reference)     | 1.0 (Reference)     | 1.0 (Reference)     |
| <b>2 or more years</b>             |                     |                     |                     |                     |

|          |                     |                     |                     |                     |
|----------|---------------------|---------------------|---------------------|---------------------|
| JAKi     | 2.11 (1.15 to 3.87) | 2.08 (1.14 to 3.82) | 1.29 (0.42 to 3.91) | 2.12 (1.15 to 3.89) |
| Non-TNFi | 0.86 (0.57 to 1.30) | 0.87 (0.58 to 1.32) | 1.03 (0.56 to 1.91) | 0.86 (0.57 to 1.31) |
| TNFi     | 1.0 (Reference)     | 1.0 (Reference)     | 1.0 (Reference)     | 1.0 (Reference)     |

Abbreviations: TNFi; tumor necrosis factor inhibitor, JAKi; janus kinase inhibitor, Non-TNFI includes rituximab, abatacept, tocilizumab.

\* HR1: adjusted for age, sex, line of therapy (for these variables, there was no missingness)

\*HR2: as HR1 but adjusted for comorbidities and SES (for these variables, there was no missingness)

\*HR3: as HR2 but additionally adjusted for disease-related factors, complete case approach

\*HR4: as HR3 but with missing categories included for those variables with missing information

**Supplementary table S10. Events, crude and standardized rates and fully adjusted hazard ratio (HR) estimated from Cox proportional hazards models for all cancers other than NMSC and for NMSC, in patients with RA initiating treatment with a JAKi, a non-TNFi or TNFi by previous number of b/tsDMARDs**

|                                      | Events | Crude incidence rate per 1,000 person-years | Standardized incidence rate per 1,000 person-years | Fully adjusted HR*  |
|--------------------------------------|--------|---------------------------------------------|----------------------------------------------------|---------------------|
| <b>All cancers other than NMSC</b>   |        |                                             |                                                    |                     |
| <b>0 previous b/tsDMARDs</b>         |        |                                             |                                                    |                     |
| JAKi                                 | 7      | 14.8                                        | 13.0                                               | 1.05 (0.48 to 2.31) |
| Non-TNFi                             | 41     | 18.0                                        | 11.8                                               | 1.12 (0.76 to 1.65) |
| TNFi                                 | 143    | 10.7                                        | 10.7                                               | 1.0 (Reference)     |
| <b>1-2 previous b/tsDMARDs</b>       |        |                                             |                                                    |                     |
| JAKi                                 | 10     | 7.06                                        | 6.1                                                | 0.79 (0.40 to 1.56) |
| Non-TNFi                             | 67     | 12.3                                        | 10.1                                               | 1.32 (0.91 to 1.91) |
| TNFi                                 | 58     | 8.6                                         | 8.6                                                | 1.0 (Reference)     |
| <b>3 or more previous b/tsDMARDs</b> |        |                                             |                                                    |                     |
| JAKi                                 | 21     | 10.0                                        | 9.0                                                | 1.11 (0.51 to 2.39) |
| Non-TNFi                             | 33     | 9.9                                         | 8.3                                                | 1.04 (0.51 to 2.09) |
| TNFi                                 | 12     | 9.6                                         | 89.6                                               | 1.0 (Reference)     |
| <b>NMSC</b>                          |        |                                             |                                                    |                     |



|                                      |     |      |      |                     |
|--------------------------------------|-----|------|------|---------------------|
| <b>0 previous b/tsDMARDs</b>         |     |      |      |                     |
| JAKi                                 | 6   | 12.7 | 6.0  | 0.99 (0.44 to 2.23) |
| Non-TNFi                             | 34  | 15.0 | 10.0 | 1.23 (0.82 to 1.85) |
| TNFi                                 | 117 | 8.8  | 8.8  | 1.0 (Reference)     |
| <b>1-2 previous b/tsDMARDs</b>       |     |      |      |                     |
| JAKi                                 | 17  | 12.1 | 11.4 | 1.10 (0.63 to 1.91) |
| Non-TNFi                             | 62  | 11.4 | 9.2  | 0.91 (0.63 to 1.30) |
| TNFi                                 | 63  | 9.7  | 9.7  | 1.0 (Reference)     |
| <b>3 or more previous b/tsDMARDs</b> |     |      |      |                     |
| JAKi                                 | 36  | 17.3 | 16.0 | 2.49 (1.15 to 5.43) |
| Non-TNFi                             | 30  | 9.0  | 8.7  | 1.24 (0.58 to 2.64) |
| TNFi                                 | 9   | 7.2  | 7.2  | 1.0 (Reference)     |

Abbreviations: TNFi; tumor necrosis factor inhibitor, JAKi; janus kinase inhibitor, Non-TNFI includes rituximab, abatacept, and tocilizumab.

Fully adjusted HR: adjusted for age, sex, line of therapy, for comorbidities, SES, disease-related factors and with missing categories included for those variables with missing information. Estimated from a proportional hazards Cox regression model. Standardized incidence rate standardized to the age- and sex- distribution in the TNFi cohort.

**Supplementary table S11. Fully adjusted hazard ratios estimated from Cox proportional hazards models comparing the rate of site-specific cancer for JAKi and non-TNFi, versus TNFi in patients with RA for both the main analysis, and when applying a 90-day latency period**

| Cohort                  | Main analysis: start of follow-up immediately after initiating treatment | Latency period: Start of follow up 90 days after initiating treatment |
|-------------------------|--------------------------------------------------------------------------|-----------------------------------------------------------------------|
|                         | Fully adjusted HR*                                                       | Fully adjusted HR*                                                    |
| <b>All cancers</b>      |                                                                          |                                                                       |
| JAKi                    | 0.94 (0.65 to 1.38)                                                      | 0.84 (0.55 to 1.27)                                                   |
| Non-TNFi                | 1.12 (0.88 to 1.43)                                                      | 1.12 (0.87 to 1.45)                                                   |
| TNFi                    | 1.0 (Reference)                                                          | 1.0 (Reference)                                                       |
| <b>NMSC</b>             |                                                                          |                                                                       |
| JAKi                    | 1.39 (1.01 to 1.91)                                                      | 1.38 (0.98 to 1.94)                                                   |
| Non-TNFi                | 1.00 (0.78 to 1.28)                                                      | 1.01 (0.78 to 1.31)                                                   |
| TNFi                    | 1.0 (Reference)                                                          | 1.0 (Reference)                                                       |
| <b>Breast cancer</b>    |                                                                          |                                                                       |
| JAKi                    | 0.73 (0.29 to 1.86)                                                      | 0.55 (0.18 to 1.67)                                                   |
| Non-TNFi                | 0.88 (0.48 to 1.61)                                                      | 0.86 (0.46 to 1.60)                                                   |
| TNFi                    | 1.0 (Reference)                                                          | 1.0 (Reference)                                                       |
| <b>All Hematopoetic</b> |                                                                          |                                                                       |
| JAKi                    | 1.90 (0.70 to 5.16)                                                      | 1.65 (0.52 to 5.26)                                                   |
| Non-TNFi                | 1.04 (0.48 to 2.25)                                                      | 0.99 (0.45 to 2.15)                                                   |
| TNFi                    | 1.0 (Reference)                                                          | 1.0 (Reference)                                                       |
| <b>Lung cancer</b>      |                                                                          |                                                                       |
| JAKi                    | 1.15 (0.57 to 2.32)                                                      | 0.99 (0.41 to 2.35)                                                   |
| Non-TNFi                | 0.59 (0.31 to 1.15)                                                      | 0.55 (0.27 to 1.09)                                                   |
| TNFi                    | 1.0 (Reference)                                                          | 1.0 (Reference)                                                       |

Abbreviations: TNFi; tumor necrosis factor inhibitor, JAKi; janus kinase inhibitor, Non-TNFI includes rituximab, abatacept, and tocilizumab.

Fully adjusted HR: adjusted for age, sex, line of therapy, for comorbidities, SES, disease-related factors and with missing categories included for those variables with missing information. Estimated from proportional hazards Cox regression models.

**Supplementary Table S12. Alternative definition of follow-up from the main analysis “ever-exposed” to a “on-drug”. Number of events, crude and standardized incidence rates and hazard ratios (HR), for all cancers other than NMSC and NMSC in Swedish patients with RA treated with JAKi, non-TNFi bDMARDs, or TNFi. Also, fully adjusted HR for ever-exposed analysis (fully presented in Table 2)**

| Cohort                             | Events | Crude incidence rate per 1,000 person-years | Standardized incidence rate per 1,000 person-years | On-drug analysis Fully adjusted HR* | Ever-exposed analysis Fully adjusted HR* presented in Table 2. |
|------------------------------------|--------|---------------------------------------------|----------------------------------------------------|-------------------------------------|----------------------------------------------------------------|
| <b>All cancers other than NMSC</b> |        |                                             |                                                    |                                     |                                                                |
| All JAKi                           | 27     | 9.9                                         | 8.5                                                | 1.01 (0.64 to 1.58)                 | 0.94 (0.65 to 1.38)                                            |
| - Tofacitinib                      | 4      | 8.7                                         | 10.4                                               | 0.99 (0.36 to 2.73)                 | 1.08 (0.52 to 2.24)                                            |
| - Baricitinib                      | 23     | 10.1                                        | 8.7                                                | 1.01 (0.64 to 1.62)                 | 0.92 (0.61 to 1.38)                                            |
| Non-TNFi bDMARD †                  | 95     | 14.0                                        | 11.0                                               | 1.20 (0.89 to 1.62)                 | 1.12 (0.88 to 1.43)                                            |
| TNFi                               | 139    | 10.0                                        | 10.0                                               | 1.0 (Reference)                     | 1.0 (Reference)                                                |
| General population                 | 1245   | 9.7                                         | 9.4                                                | n/a                                 | n/a                                                            |
| <b>NMSC</b>                        |        |                                             |                                                    |                                     |                                                                |
| All JAKi                           | 41     | 15.1                                        | 13.2                                               | 1.35 (0.91 to 1.99)                 | 1.39 (1.01 to 1.91)                                            |
| - Tofacitinib                      | 6      | 13.3                                        | 13.0                                               | 1.32 (0.56 to 3.12)                 | 1.56 (0.83 to 2.92)                                            |
| - Baricitinib                      | 35     | 15.6                                        | 13.0                                               | 1.36 (0.90 to 2.04)                 | 1.37 (0.97 to 1.92)                                            |
| Non-TNFi bDMARD †                  | 74     | 10.9                                        | 8.0                                                | 0.83 (0.61 to 1.14)                 | 1.00 (0.78 to 1.28)                                            |
| TNFi                               | 129    | 9.4                                         | 9.4                                                | 1.0 (Reference)                     | 1.0 (Reference)                                                |
| General population                 | 852    | 6.6                                         | 6.4                                                | n/a                                 | n/a                                                            |

Abbreviations: TNFi; tumor necrosis factor inhibitor, JAKi; janus kinas inhibitor, † Non-TNFI bDMARD includes rituximab, abatacept, tocilizumab. n/a: analyses not performed

\*Fully adjusted HR: adjusted for age, sex, line of therapy, for comorbidities, SES, disease-related factors and with missing categories included for those variables with missing information. Estimated from Cox proportional hazards models. Standardized incidence rate standardized to the age- and sex- distribution in the TNFi cohort. - is displayed when too few events (<5) were observed

**Supplementary Table 13. Fully adjusted HR (presented in Table 2) and fully adjusted HR after multiple imputation for all cancers other than NMSC in Swedish patients with RA treated with JAKi, non-TNFi bDMARDs, or TNFi.**

| Cohort                      | Fully adjusted HR* presented in Table 2 | Fully adjusted HR after multiple imputation** |
|-----------------------------|-----------------------------------------|-----------------------------------------------|
| All cancers other than NMSC |                                         |                                               |
| All JAKi                    | 0.94 (0.65 to 1.38)                     | 0.93 (0.64 to 1.36)                           |
| - Tofacitinib               | 1.08 (0.52 to 2.24)                     | 1.09 (0.52 to 2.29)                           |
| - Baricitinib               | 0.92 (0.61 to 1.38)                     | 0.91 (0.60 to 1.36)                           |
| Non-TNFi bDMARD †           | 1.12 (0.88 to 1.43)                     | 1.11 (0.87 to 1.42)                           |
| TNFi                        | 1.0 (Reference)                         | 1.0 (Reference)                               |
| General population          | n/a                                     | n/a                                           |

Abbreviations: TNFi; tumor necrosis factor inhibitor, JAKi; janus kinas inhibitor, † Non-TNFi bDMARD includes rituximab, abatacept, tocilizumab. n/a: analyses not performed

\*Fully adjusted HR: adjusted for age, sex, line of therapy, for comorbidities, SES, disease-related factors and with missing categories included for those variables with missing information. Estimated from Cox proportional hazards models. Standardized incidence rate standardized to the age- and sex- distribution in the TNFi cohort. - is displayed when too few events (<5) were observed

\*\*multiple imputation using chained equations performed with 30 repetitions for variables with missing information (DAS28CRP, CRP using multinomial logistic regression; disease duration, smoking, civil status and education using logistic regression). Imputation models were adjusted for all covariates included in the analysis model plus the event indicator and the Nelson-Aalen estimate of the cumulative hazard.

**Supplementary Table 14. Fully adjusted HR (presented in Table 2) and fully adjusted HR after sensitivity analysis restricting the follow-up to Feb 2020 (COVID Pandemic), for all cancers other than NMSC in Swedish patients with RA treated with JAKi, non-TNFi bDMARDs, or TNFi.**

| Cohort                             | Fully adjusted HR* presented in Table 2 | Fully adjusted HR * after sensitivity analysis |
|------------------------------------|-----------------------------------------|------------------------------------------------|
| <b>All cancers other than NMSC</b> |                                         |                                                |
| All JAKi                           | 0.94 (0.65 to 1.38)                     | 0.78 (0.48 to 1.26)                            |
| - Tofacitinib                      | 1.08 (0.52 to 2.24)                     | 0.92 (0.37 to 2.33)                            |
| - Baricitinib                      | 0.92 (0.61 to 1.38)                     | 0.74 (0.44 to 1.26)                            |
| Non-TNFi bDMARD †                  | 1.12 (0.88 to 1.43)                     | 1.14 (0.86 to 1.51)                            |
| TNFi                               | 1.0 (Reference)                         | 1.0 (Reference)                                |
| General population                 | n/a                                     | n/a                                            |

Abbreviations: TNFi; tumor necrosis factor inhibitor, JAKi; janus kinas inhibitor, † Non-TNFi bDMARD includes rituximab, abatacept, tocilizumab. n/a: analyses not performed

\*Fully adjusted HR: adjusted for age, sex, line of therapy, for comorbidities, SES, disease-related factors and with missing categories included for those variables with missing information. Estimated from Cox proportional hazards models. Standardized incidence rate standardized to the age- and sex- distribution in the TNFi cohort. - is displayed when too few events (<5) were observed

**Supplementary Table S15. Events, crude and standardized rates and fully adjusted hazard ratio (HR) estimated from Cox proportional hazards models for cancers other than NMSC in a cardiovascular risk-factor enriched subset (defined in supplementary Table S4)**

| <b>Cohort</b> | <b>Events</b> | <b>Crude incidence rate</b> | <b>Standardized incidence rate</b> | <b>HR1*</b>         | <b>HR2*</b>         | <b>HR3*</b>         | <b>HR4*</b>         |
|---------------|---------------|-----------------------------|------------------------------------|---------------------|---------------------|---------------------|---------------------|
| All JAKi      | 17            | 15.5                        | 14.7                               | 1.04 (0.59 to 1.84) | 1.01 (0.56 to 1.82) | 0.60 (0.20 to 1.82) | 1.03 (0.58 to 1.82) |
| - Tofacitinib | 3             | 14.2                        | -                                  | -                   | -                   | -                   | -                   |
| - Baricitinib | 14            | 15.8                        | 13.9                               | 1.01 (0.55 to 1.86) | 0.98 (0.52 to 1.84) | 0.37 (0.09 to 1.56) | 1.01 (0.55 to 1.85) |
| Non-TNFi      | 61            | 19.7                        | 18.2                               | 1.16 (0.81 to 1.66) | 1.05 (0.73 to 1.52) | 1.33 (0.74 to 2.41) | 1.12 (0.76 to 1.63) |
| TNFi          | 79            | 17.5                        | 17.5                               | 1.0 (Reference)     | 1.0 (Reference)     | 1.0 (Reference)     | 1.0 (Reference)     |

Abbreviations: TNFi; tumor necrosis factor inhibitor, JAKi; janus kinase inhibitor, Non-TNFI includes rituximab, abatacept, or tocilizumab.

Incidence rates presented per 1,000 person-years.

\*HR1: adjusted for age, sex, line of therapy (for these variables, there was no missingness)

\*HR2: as HR1 but adjusted for comorbidities and SES (for these variables, there was no missingness)

\*HR3: as HR2 but additionally adjusted for disease-related factors, complete case approach

\*HR4: as HR3 but with missing categories included for those variables with missing information

- Is displayed when too few events (<5) were observed



**Supplementary table S16. Hazard Ratios (HR1-4), events, crude and standardized incidence rates and hazard ratios (HR) for all cancers other than NMSC and NMSC in Swedish patients with PsA treated with JAKi**

| Cohort                             | Events | Crude incidence rate | Standardized incidence rate | HR1*                | HR2*                | HR3*                | HR4*                |
|------------------------------------|--------|----------------------|-----------------------------|---------------------|---------------------|---------------------|---------------------|
| <b>All cancers other than NMSC</b> |        |                      |                             |                     |                     |                     |                     |
| JAKi                               | 5      | 8.6                  | 7.3                         | 1.64 (0.61 to 4.37) | 1.69 (0.63 to 4.49) | 1.11 (0.14 to 8.64) | 1.88 (0.68 to 5.16) |
| Non-TNFi                           | 2      | 4.8                  | -                           | -                   | -                   | -                   | -                   |
| TNFi                               | 73     | 5.8                  | 5.8                         | 1.0 (Reference)     | 1.0 (Reference)     | 1.0 (Reference)     | 1.0 (Reference)     |
| Gen population                     | 317    | 5.9                  | 6.0                         | 0.87 (0.66 to 1.16) | 0.93 (0.70 to 1.23) | n/a                 | n/a                 |
| <b>NMSC</b>                        |        |                      |                             |                     |                     |                     |                     |
| JAKi                               | 8      | 13.9                 | 11.7                        | 2.27 (0.98 to 5.25) | 2.40 (1.02 to 5.63) | 1.82 (0.52 to 6.40) | 2.05 (0.79 to 5.31) |
| Non-TNFi                           | 2      | 4.8                  | -                           | -                   | -                   | -                   | -                   |
| TNFi                               | 73     | 5.8                  | 5.8                         | 1.0 (Reference)     | 1.0 (Reference)     | 1.0 (Reference)     | 1.0 (Reference)     |
| Gen population                     | 209    | 3.9                  | 3.9                         | 0.70 (0.51 to 0.96) | 0.70 (0.51 to 0.97) | n/a                 | n/a                 |

Abbreviations: TNFi; tumor necrosis factor inhibitor, JAKi; janus kinas inhibitor, Non-TNFI includes rituximab, abatacept, and tocilizumab.

Incidence rates presented per 1,000 person-years.

\*HR1: adjusted for age, sex, line of therapy (for these variables, there was no missingness)

\*HR2: as HR1 but adjusted for comorbidities and SES (for these variables, there was no missingness)

\*HR3: as HR2 but additionally adjusted for disease-related factors, complete case approach

\*HR4: as HR3 but with missing categories included for those variables with missing information

n/a presented where analyses not performed (due to disease-related factors not being available for the general population comparator)

- Is displayed when too few events (<5) were observed
